# Supplementary material
Source: Research Square preprint supplement (doi:10.21203/rs.3.rs-9225846/v1)
Supplement: Supplementary file 1 [file a577e883c517f7de1a04f55e.xlsx]

## Sheet: Table S1
Supplementary Table S1. Training and validation of deep learning models for canine lymphoma using 10-fold cross-validation.
Fold	Epoch	Train Accuracy	Validation Accuracy	Train Loss	Validation Loss
1	1	0.8331	0.9341	0.3782	0.1619
1	2	0.9009	0.9455	0.2416	0.136
1	3	0.9176	0.9477	0.2049	0.1264
1	4	0.9315	0.9386	0.1675	0.1877
1	5	0.9373	0.925	0.1643	0.1536
1	6	0.9484	0.9364	0.1342	0.1552
1	7	0.9512	0.9568	0.1275	0.1209
1	8	0.9588	0.9705	0.1114	0.1062
1	9	0.9555	0.9614	0.1113	0.0855
1	10	0.958	0.9159	0.1044	0.2912
1	11	0.9601	0.9341	0.1036	0.2023
1	12	0.9618	0.9659	0.0962	0.0813
1	13	0.9651	0.9432	0.087	0.1497
1	14	0.9664	0.9523	0.0853	0.1299
1	15	0.9651	0.9727	0.0939	0.072
1	16	0.9702	0.9682	0.0791	0.0931
1	17	0.9724	0.9659	0.0738	0.1202
1	18	0.9722	0.975	0.075	0.1023
1	19	0.9699	0.9068	0.0802	0.8311
2	1	0.8344	0.8591	0.3774	0.4286
2	2	0.9032	0.9227	0.2346	0.1912
2	3	0.9186	0.9295	0.1986	0.2925
2	4	0.9259	0.9659	0.1869	0.1533
2	5	0.9365	0.9523	0.1595	0.1981
2	6	0.9456	0.9591	0.1284	0.1829
2	7	0.9469	0.9409	0.1339	0.1835
2	8	0.9595	0.9568	0.1082	0.3379
3	1	0.8111	0.8659	0.3944	0.3949
3	2	0.8989	0.8909	0.2481	0.4325
3	3	0.9171	0.9523	0.2014	0.1486
3	4	0.9322	0.9568	0.1734	0.1215
3	5	0.9381	0.9409	0.1546	0.159
3	6	0.9454	0.9386	0.1347	0.1603
3	7	0.9484	0.9432	0.1243	0.1429
3	8	0.9512	0.9545	0.1199	0.1541
4	1	0.8364	0.8591	0.3881	0.4761
4	2	0.9004	0.9477	0.2464	0.1748
4	3	0.9252	0.9136	0.191	0.2194
4	4	0.9315	0.9136	0.1764	0.2549
4	5	0.9391	0.9545	0.1576	0.1127
4	6	0.9472	0.8273	0.1348	0.9012
4	7	0.9484	0.95	0.13	0.2366
4	8	0.9588	0.9659	0.1107	0.0794
4	9	0.9575	0.9818	0.1112	0.0606
4	10	0.956	0.9727	0.1088	0.0909
4	11	0.9666	0.9636	0.086	0.0895
4	12	0.9656	0.9545	0.0913	0.1198
4	13	0.9689	0.9659	0.0867	0.1139
5	1	0.7962	0.9227	0.4404	0.2112
5	2	0.8728	0.925	0.2983	0.1673
5	3	0.908	0.9364	0.2389	0.1749
5	4	0.9188	0.9068	0.1992	0.2137
5	5	0.9383	0.9591	0.1685	0.1026
5	6	0.9429	0.9659	0.1474	0.114
5	7	0.9482	0.9682	0.1472	0.1004
5	8	0.9499	0.9614	0.1263	0.1139
5	9	0.9547	0.9386	0.1235	0.1945
5	10	0.9552	0.9273	0.1152	0.295
5	11	0.9608	0.9545	0.1062	0.1947
6	1	0.845	0.8793	0.3649	0.438
6	2	0.9052	0.9613	0.2393	0.1259
6	3	0.9178	0.9453	0.1967	0.1595
6	4	0.9317	0.9499	0.172	0.1208
6	5	0.9398	0.9499	0.1552	0.1152
6	6	0.952	0.9613	0.1331	0.1472
6	7	0.9525	0.9362	0.1277	0.2247
6	8	0.9507	0.9408	0.1271	0.1463
6	9	0.9553	0.959	0.11	0.152
7	1	0.8203	0.8907	0.3983	0.23
7	2	0.8971	0.8724	0.2537	0.3777
7	3	0.9189	0.9613	0.2024	0.0897
7	4	0.93	0.9362	0.1834	0.244
7	5	0.9325	0.8975	0.1801	0.23
7	6	0.9391	0.9863	0.1564	0.0524
7	7	0.9454	0.9681	0.1395	0.098
7	8	0.952	0.9772	0.1245	0.0916
7	9	0.9573	0.9157	0.1119	1.2929
7	10	0.9525	0.9727	0.1231	0.0752
8	1	0.8238	0.8861	0.3851	0.2447
8	2	0.8964	0.9681	0.244	0.1182
8	3	0.9226	0.9453	0.1979	0.1525
8	4	0.9323	0.9567	0.1624	0.1825
8	5	0.9388	0.918	0.1466	0.4949
8	6	0.9472	0.9841	0.1399	0.0435
8	7	0.9515	0.9727	0.1243	0.0771
8	8	0.957	0.9863	0.1084	0.0335
8	9	0.9623	0.9203	0.0971	1.1085
8	10	0.9583	0.9658	0.1113	0.2519
8	11	0.9669	0.9317	0.0986	1.3378
8	12	0.9674	0.9863	0.0836	0.0532
9	1	0.8322	0.8929	0.3831	0.2334
9	2	0.9037	0.9453	0.2379	0.1337
9	3	0.9239	0.959	0.1931	0.1379
9	4	0.9333	0.8178	0.1692	0.6913
9	5	0.9449	0.8907	0.1568	0.2783
9	6	0.9479	0.9636	0.1355	0.0877
9	7	0.9505	0.9658	0.1225	0.0897
9	8	0.952	0.861	0.1247	1.5259
9	9	0.9575	0.9248	0.1106	0.4927
9	10	0.9553	0.9271	0.1079	0.5185
10	1	0.8309	0.8838	0.3868	0.2275
10	2	0.8845	0.9362	0.2671	0.1578
10	3	0.9108	0.9066	0.2145	0.2411
10	4	0.9211	0.8451	0.1954	0.3452
10	5	0.9398	0.9636	0.1637	0.0827
10	6	0.9446	0.9134	0.1423	0.2814
10	7	0.9507	0.9681	0.123	0.0897
10	8	0.9487	0.9567	0.1281	0.1226
10	9	0.9578	0.9841	0.1135	0.083

## Sheet: Table S2
Supplementary Table S2. Model accuracy and misclassification of images for lymphoma patients.
Lymphoma patient	# total images	Correctly classified (number)	Correct classification (TP, %)	Misclassifed as RLH (number)	Misclassification (FN, %)
1	4	4	100	0	0
2	7	7	100	0	0
3	25	25	100	0	0
4	19	19	100	0	0
5	14	14	100	0	0
6	1	1	100	0	0
7	15	15	100	0	0
8	7	7	100	0	0
9	31	31	100	0	0
10	15	15	100	0	0
11	4	4	100	0	0
12	8	8	100	0	0
13	13	13	100	0	0
14	20	20	100	0	0
15	58	57	98.28	1	1.72
16	76	74	97.37	2	2.63
17	26	22	84.62	4	15.38
18	12	8	66.67	4	33.33
19	23	4	17.39	19	82.61
20	4	0	0	4	100
Total	382	348		34

## Sheet: Table S3
Supplementary Table S3. Model accuracy and misclassification of images for RLH patients.
RLH patient	# total images	Correctly classified (number)	Correct classification (TN, %)	Misclassified as RLH (number)	Misclassification (FP, %)
1	39	39	100	0	0
2	40	40	100	0	0
3	37	37	100	0	0
4	36	36	100	0	0
5	49	49	100	0	0
6	40	40	100	0	0
7	20	20	100	0	0
8	40	40	100	0	0
9	7	7	100	0	0
10	59	59	100	0	0
11	75	73	97.3333	2	2.66667
12	31	30	96.7742	1	3.22581
13	28	27	96.4286	1	3.57143
14	31	29	93.5484	2	6.45161
15	29	27	93.1034	2	6.89655
16	40	28	70	12	30
Total	601	581		20
